# Supplementary material for: Molecular Docking of Potential Inhibitors for Influenza H7N9
Source: Comput Math Methods Med. 2015 Mar 15;2015:480764. doi: 10.1155/2015/480764 (PMC4377397; doi:10.1155/2015/480764)
Supplement: Supplementary file 1 — The Supplementary Material of Table S1 provide the detailed results of the top 3 scored poses for the complexes of neuraminidases from A/Anhui/1/2013 and A/Shanghai/1/2013 docking with each small molecule. [file 480764.f1.xlsx]

## Sheet: Sheet1
Table S1 - The detailed results for the top 3 scored poses for each small molecule
NA Type	Molecules	Number of Hbond	(vdW + Hbond +desolv) energy (kcal/mol)	Electrostatic energy (kcal/mol)	Total Internal energy (kcal/mol)	The best docking energy (kcal/mol)	Inhibition constant (nM)
A/Anhui/1/2013	Oseltamivir carboxylate	12	-7.24	-3.46	-11.47	-9.38	132.26
		9	-6.06	-2.79	-17.93	-8.02	1320
		9	-5.9	-2.13	-22.09	-7.8	1910
	Quercetin	14	-6.69	-1.27	-11.2	-9.41	126.87
		12	-6.93	-1.09	-21.25	-8.42	672.66
		13	-7.37	-1.01	-23.57	-8.37	726.3
	Chlorogenic acid	18	-10.24	-3.11	-15.21	-12.23	1.09
		13	-8.07	-3.44	-12.48	-9.5	108.6
		16	-9.11	-1.38	-12.09	-9.11	210.09
	Oleanolic acid	5	-6.18	-2.2	-11.79	-11.2	6.19
		6	-5.29	-1.89	-18.85	-10.64	360.35
		6	-5.71	-0.76	-20.98	-9.64	85.63
	Baicalein	12	-8.69	-3.3	-18.95	-11.45	4.02
		16	-10.49	-2.78	-20.55	-11.33	4,97
		19	-9.53	-1.94	-24.12	-10.98	8.87
A/Shanghai/1/2013	Oseltamivir carboxylate	9	-4.22	-3.94	-9	-6.91	8590
		8	-3.34	-2.51	-11.88	-6.5	17260
		8	-4.43	-3.57	-14.05	-6.44	19130
	Quercetin	11	-6.17	-1.34	-11.03	-9.24	168.62
		9	-3.91	-0.21	-12.75	-7.09	6330
		10	-5.22	-0.3	-14.77	-6.68	12590
	Chlorogenic acid	17	-6.98	-2.42	-12.8	-9.82	63.6
		15	-6.62	-3.16	-15.4	-8.64	467.28
		21	-7.31	-3.37	-15.18	-8.34	768.79
	Oleanolic acid	8	-4.36	-4	-10.11	-9.51	106.11
		4	-3.21	-2.19	-12.4	-8.81	345.82
		7	-3.98	-2.13	-13.12	-8.21	963.46
	Baicalein	15	-6.57	-3.28	-16.23	-10.23	27.11
		15	-7.61	-3.27	-10.61	-9.98	48.19
		15	-8.15	-2.22	-12.27	-9.71	75.86
